# Supplementary material for: NORAD accelerates chemo-resistance of non-small-cell lung cancer via targeting at miR-129-1-3p/SOX4 axis
Source: PubMed Central journal article supplement (PMC6981097; doi:10.1042/bsr20193489), 2020-01-24
Supplement: BSR-2019-3489_supp.pdf [file BSR-2019-3489_supp.pdf]

A

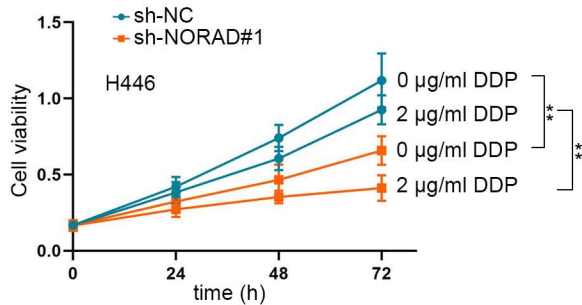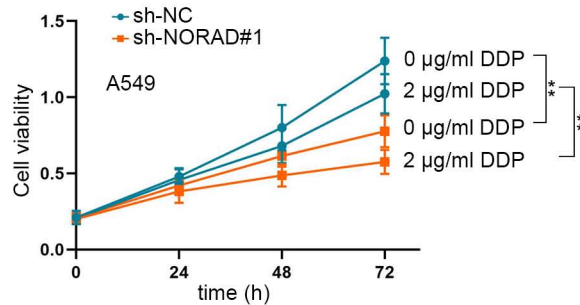

B

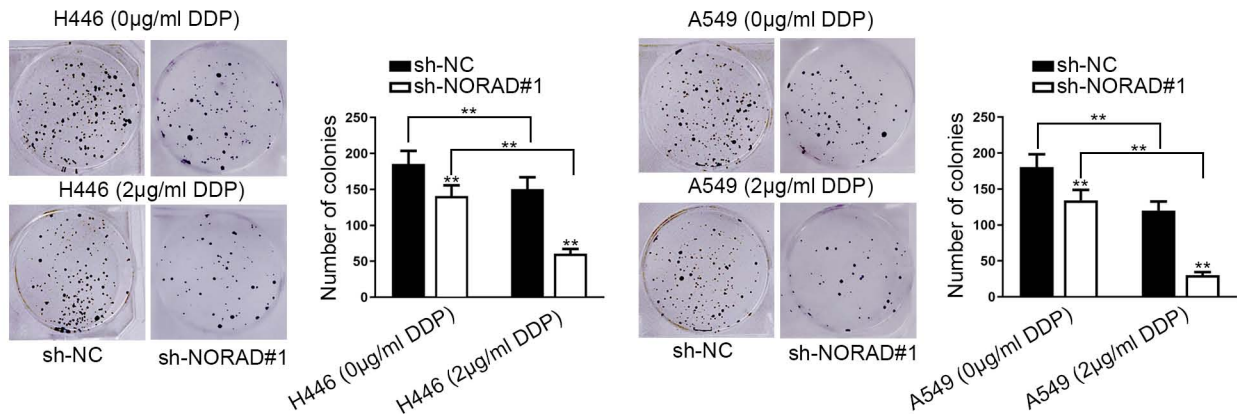

## **Supplementary figure1**

A. MTT assays were conducted to evaluate cell viability in H449 and A549 cell lines with or without DDP treatment. B. Colony formation assays were performed to assess cell proliferative ability with or without DDP treatment in H449 and A549 cell lines with or without DDP treatment. \*\*P < 0.01.
